# Supplementary material
Source: PubMed Central journal article supplement (PMC5942874)
Supplement: la7b04331_si_001.pdf [file la7b04331_si_001.pdf]

**Floating- and Tether-coupled Adhesion of Bacteria  
to Hydrophobic and Hydrophilic Surfaces**

**Supporting Information**

Rebecca van der Westen,<sup>†</sup> Jelmer Sjollema,<sup>†</sup> Robert Molenaar,<sup>‡</sup> Prashant K. Sharma,<sup>†</sup> Henny C. van der Mei,<sup>†</sup> Henk J. Busscher<sup>†\*</sup>

<sup>†</sup>University of Groningen and University Medical Center Groningen, Department of Biomedical Engineering, Antonius Deusinglaan-1, 9713AV, Groningen, The Netherlands

<sup>‡</sup>Nanobiophysics group, Department of Science and Technology, University of Twente, P.O box 217, 7500AE Enschede, The Netherlands

Total number of pages: 2

Tables: 1

**\*Corresponding author:**

Henk J. Busscher

Department of Biomedical Engineering, University Medical Center Groningen and University of Groningen, P.O Box 196, 9700 AD, Groningen, The Netherlands.

[h.j.busscher@umcg.nl](mailto:h.j.busscher@umcg.nl)

Tel: +31 50 3616095/3616094

**Table S1** Surface free energy parameters and components of the three liquids used for contact angle measurements.  $\gamma^-$  and  $\gamma^+$  are the electron-donating and electron-accepting parameters, while  $\gamma^{AB}$  and  $\gamma^{LW}$  are the acid-base and Lifshitz-Van der Waals components, respectively. All data in ( $\text{mJ m}^{-2}$ ) and taken from Van Oss et al.<sup>1</sup>

| Parameters and components | Water | Formamide | Methyleneiodide |
|---------------------------|-------|-----------|-----------------|
| $\gamma^-$                | 25.5  | 39.6      | < 0.1           |
| $\gamma^+$                | 25.5  | 2.3       | < 0.1           |
| $\gamma^{AB}$             | 51.0  | 19.0      | 0.0             |
| $\gamma^{LW}$             | 21.8  | 39.0      | 50.8            |

#### References

- (1) Van Oss, C. J.; Good, R. J.; Busscher, H. J. Estimation of the Polar Surface Tension Parameters of Glycerol and Formamide, for Use in Contact Angle Measurements on Polar Solids. *J. Dispers. Sci. Technol.* **1990**, *11*, 75–81.
